# Supplementary material for: The Transcriptomic Response of the Boll Weevil, Anthonomus grandis grandis Boheman (Coleoptera: Curculionidae), following Exposure to the Organophosphate Insecticide Malathion
Source: MDPI journal article supplement (doi:10.3390/insects14020197), 2023-02-16
Supplement: s1 [file s1]

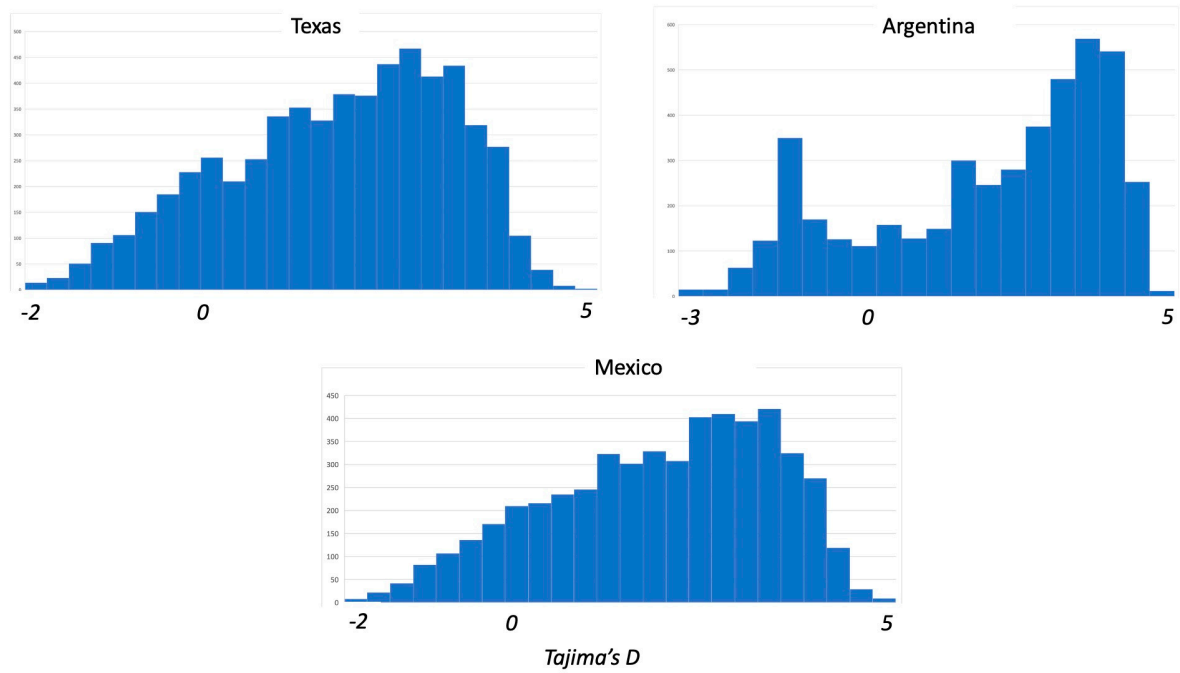

**Figure S1.** Tajima's D values within the 4 MB region on Chromosome 8 for each of three boll weevil populations (Texas, Argentina, and Mexico). The x-axis is the Tajima's D value; there was no evidence of directional selection within this region for any population but a signature of a founder event in Argentina and admixture between boll weevil populations in Mexico and Texas are noted.
