# Supplementary material for: The Transcriptomic Response of the Boll Weevil, Anthonomus grandis grandis Boheman (Coleoptera: Curculionidae), following Exposure to the Organophosphate Insecticide Malathion
Source: Insects. 2023 Feb 16;14(2):197. doi: 10.3390/insects14020197 (PMC9960965; doi:10.3390/insects14020197)
Supplement: Supplementary file 1 [file insects-14-00197-s001.zip › insects-2130520-supplementary Table S1.xlsx]

## Sheet: upregulated
Gene	Annotation	LowDose (pval)	HighDose (pval)
jg15710.t1	acetylcholinesterase-like isoform X1	2.44055e-05	0.00011037
jg10428.t1	alpha-1,3-mannosyl-glycoprotein 4-beta-N-acetylglucosaminyltransferase B	0.00179967	0.000181623
jg10519.t1	mucolipin-3-like	0.000362704	0.000189548
jg10676.t1	serine/threonine-protein kinase PINK1, mitochondrial	0.00441437	0.00926472
jg10844.t1	neuroblastoma, suppression of tumorigenicity 1	0.000620708	0.000135694
jg11068.t1	RAC serine/threonine-protein kinase	1.93666e-07	1.85987e-05
jg11203.t1	fatty acid hydroxylase domain-containing protein 2 isoform X2	0.00150947	0.00868024
jg11231.t1	zinc finger protein 354A-like	1.60132e-05	0.000339462
jg11308.t1	hypothetical protein D910_10159	0.00299996	0.00143992
jg11516.t1	hypothetical protein GWI33_016063	0.000536598	0.00153764
jg11887.t1	ribosome biogenesis protein NOP53	0.000140992	0.00163236
jg12002.t1	retinal rod rhodopsin-sensitive cGMP 3',5'-cyclic phosphodiesterase subunit delta	1.63111e-05	0.00039128
jg12297.t1	activating signal cointegrator 1 complex subunit 1-like	0.00081006	3.65181e-05
jg12352.t1	uncharacterized protein LOC115882563	0.000221069	0.000184167
jg12365.t1	protein halfway	2.25064e-06	0.000565958
jg1239.t1	J domain-containing protein	0.00555627	0.000105362
jg12406.t1	fatty acid synthase-like	0.00027162	3.42639e-05
jg12504.t1	ATP-binding cassette sub-family B member 6	1.74767e-05	1.99319e-05
jg12524.t1	calcium/calmodulin-dependent protein kinase kinase 1 isoform X3	4.29289e-07	6.29987e-05
jg12525.t1	unnamed protein product	0.000276053	0.00949899
jg12749.t1	formin-like protein 7	0.000515946	0.00830632
jg12887.t1	poly(A)-specific ribonuclease PARN-like	0.00628819	0.00472395
jg13060.t1	hypothetical protein HUJ05_004392	9.40699e-05	0.000183817
jg13063.t1	band 7 protein AGAP004871 isoform X1	3.38659e-05	8.76754e-05
jg13149.t1	DEAD-box ATP-dependent RNA helicase 20-like isoform X3	6.48527e-07	7.56026e-08
jg13152.t1	DEAD-box ATP-dependent RNA helicase 20-like isoform X1	4.2645e-07	3.56855e-07
jg13153.t1	ATP-dependent RNA helicase p62-like	3.12137e-06	0.000187628
jg13305.t1	tyrosine-protein phosphatase Lar isoform X1	0.00192255	0.00380504
jg13327.t1	transcriptional regulator Myc-like	4.47242e-09	4.85693e-05
jg13330.t1	transcriptional regulator Myc-like	5.40767e-10	5.39428e-05
jg13511.t1	protein NDRG3-like isoform X2	0.000522247	0.000154642
jg13512.t1	protein NDRG3-like isoform X3	8.5709e-05	0.000115155
jg1364.t1	required for respiratory growth protein 9, mitochondrial	0.00517514	0.00243696
jg13654.t1	heparan-alpha-glucosaminide N-acetyltransferase-like	0.00275376	0.00197607
jg13990.t1	ankyrin repeat domain-containing protein 12 isoform X2	0.00502273	1.00319e-06
jg14205.t1	phosphoribosyl pyrophosphate synthase-associated protein 2	8.64322e-05	0.00153475
jg14496.t1	ribosome biogenesis regulatory protein homolog	0.000148678	0.00047597
jg14509.t1	homogentisate 1,2-dioxygenase	0.000684067	0.000523887
jg14700.t1	microspherule protein 1	0.00438073	0.00103324
jg14701.t1	UPF0488 protein CG14286	0.00214477	0.00292892
jg14735.t1	transcription factor Adf-1-like	0.000219274	0.000325858
jg14756.t1	hypothetical protein HUJ04_010099	8.22196e-05	8.91058e-05
jg14759.t1	tyrosine-protein phosphatase corkscrew isoform X2	0.00497989	0.000227505
jg14787.t1	ERAD-associated E3 ubiquitin-protein ligase HRD1B-like	0.00108213	0.00242058
jg14795.t1	RNA polymerase-associated protein CTR9 homolog	0.00129883	0.000185416
jg15095.t1	protein fem-1 homolog CG6966 isoform X1	0.00269337	0.000597016
jg15247.t1	---NA---	0.00104512	1.57588e-06
jg15279.t1	solute carrier family 25 member 36-A isoform X1	0.00209745	0.000672084
jg15331.t1	nucleolar complex protein 4 homolog A	3.25059e-06	5.07403e-05
jg15335.t1	nuclear distribution protein nudE-like 1-B isoform X1	0.0014108	4.01392e-05
jg15412.t1	chitinase 3	0.000418679	0.00010147
jg1555.t1	hemocyte protein-glutamine gamma-glutamyltransferase-like	2.5354e-06	0.00619466
jg15579.t1	tigger transposable element-derived protein 6-like	0.00156564	0.00580785
jg15613.t1	fumarylacetoacetase	2.75566e-05	1.92187e-06
jg15707.t1	unnamed protein product	0.00202583	7.90982e-05
jg15758.t1	---NA---	0.0052419	0.00052595
jg15759.t1	protein ecdysoneless	1.97818e-05	0.000136865
jg15769.t1	C1 family cathepsin F10	1.95375e-05	0.000112438
jg15772.t1	C1 family cathepsin F10	0.000553853	0.000749037
jg15854.t1	protein arginine N-methyltransferase 9-like	0.000600957	5.71761e-06
jg15948.t1	ubiquitin conjugation factor E4 A	0.000117671	0.00044113
jg16048.t1	PREDICTED: uncharacterized protein LOC109535870 isoform X2	1.62122e-05	0.000219977
jg16093.t1	nitric oxide synthase-interacting protein homolog	1.32104e-06	6.72087e-05
jg16225.t1	WD repeat-containing protein 47 isoform X4	0.00269341	0.000421442
jg16311.t1	2-oxoglutarate and iron-dependent oxygenase domain-containing protein 3-like	0.00177805	0.0029334
jg16391.t1	autophagy-related protein 13 homolog isoform X1	0.00296003	0.00207458
jg16415.t1	vacuolar protein sorting-associated protein 45	0.00110772	0.005466
jg16546.t1	nudC domain-containing protein 1	0.00562441	0.000201437
jg16917.t1	hypothetical protein HUJ05_012328	1.59236e-05	3.95846e-06
jg16919.t1	52 kDa repressor of the inhibitor of the protein kinase-like	5.41557e-06	4.39026e-07
jg17841.t1	splicing factor 3B subunit 1 isoform X1	0.00038886	0.000400954
jg17842.t1	splicing factor 3B subunit 1 isoform X1	0.00100525	0.00863927
jg18167.t1	actin-binding protein IPP	0.00179649	0.000191776
jg18176.t1	histone RNA hairpin-binding protein	0.000360302	0.000119827
jg18244.t1	cAMP-responsive element-binding protein-like 2	0.00053889	0.000148166
jg18281.t1	rho GTPase-activating protein 21 isoform X3	0.00282466	0.00548979
jg18282.t1	rho GTPase-activating protein 21-like	0.000143971	2.76953e-05
jg18283.t1	rho GTPase-activating protein 21 isoform X3	4.20977e-05	1.34848e-05
jg18410.t1	gastric triacylglycerol lipase-like	7.7324e-06	1.96965e-05
jg18431.t1	neuropilin and tolloid-like protein 1 isoform X1	0.00518275	0.00147277
jg19045.t1	decaprenyl-diphosphate synthase subunit 2-like	0.000471199	0.000825623
jg19061.t1	protein Dr1	7.72197e-08	3.92187e-06
jg19321.t1	extended synaptotagmin-2 isoform X2	0.00190569	0.000135184
jg19341.t1	putative beta-carotene-binding protein	1.42169e-05	0.00383548
jg19377.t1	tyrosine aminotransferase	2.07256e-08	2.54118e-05
jg19463.t1	T-box transcription factor T isoform X2	0.00337344	0.000279162
jg19471.t1	zinc finger protein OZF-like	0.000203675	5.17878e-05
jg19720.t1	ATP-dependent helicase brm-like	0.0028907	0.000370739
jg19724.t1	inositol monophosphatase 2-like	0.00240993	0.00198084
jg19772.t1	E3 ubiquitin-protein ligase SMURF2	0.00480796	0.00789866
jg19921.t1	protein slowmo	2.68097e-08	0.000972422
jg19922.t1	COMM domain-containing protein 2	0.00028486	8.19392e-05
jg20192.t1	nuclear pore complex protein Nup98-Nup96	0.0043053	0.00420083
jg20281.t1	E3 ubiquitin-protein ligase TRIM17	3.2077e-05	3.25901e-05
jg21128.t1	failed axon connections isoform X1	0.00222876	6.12427e-05
jg21349.t1	zinc finger protein castor homolog 1-like isoform X1	0.00130176	0.00206124
jg21350.t1	zinc finger protein castor homolog 1-like isoform X1	0.00128403	0.000484188
jg21693.t1	GILT-like protein 1	0.000123825	0.000145688
jg21790.t1	ferritin subunit-like	1.9113e-06	0.0014723
jg21791.t1	ferritin heavy polypeptide-like 17	3.26043e-05	0.00152673
jg21801.t1	MLX-interacting protein-like	2.1679e-06	0.000643925
jg21803.t1	MLX-interacting protein isoform X3	3.25557e-05	0.000455799
jg22058.t1	facilitated trehalose transporter Tret1-like	1.28161e-05	0.00202812
jg22096.t1	hypothetical protein HUJ04_009273	1.21536e-05	0.00185086
jg22684.t1	odorant receptor 8	0.00137781	0.000456718
jg2323.t1	---NA---	0.000389345	0.00168595
jg23463.t1	facilitated trehalose transporter Tret1-like	0.00237531	0.0015949
jg23482.t1	hypothetical protein YQE_05609, partial	0.00235133	3.49109e-05
jg23613.t1	PREDICTED: uncharacterized protein LOC109536617	0.000600153	0.0071153
jg23614.t1	PREDICTED: uncharacterized protein LOC109536618	0.00310117	0.000469111
jg23638.t1	transcription elongation factor SPT6 isoform X2	0.00219923	7.72933e-05
jg23672.t1	Low density lipoprotein receptor adapter protein 1	0.00029421	0.00422012
jg23682.t1	eukaryotic translation initiation factor 4E-binding protein 2	1.31664e-05	0.00252331
jg23712.t1	methyltransferase-like protein 14 homolog	1.85525e-05	0.000132819
jg23753.t1	probable tRNA (guanine(26)-N(2))-dimethyltransferase isoform X1	0.00188021	0.00580324
jg23883.t1	facilitated trehalose transporter Tret1-like isoform X1	0.00148224	0.000582555
jg23888.t1	FERM and PDZ domain-containing protein 2-like	0.000720221	0.00638795
jg23897.t1	elongation of very long chain fatty acids protein AAEL008004-like	1.11831e-06	3.27809e-06
jg24011.t1	patatin-like phospholipase domain-containing protein 2 isoform X2	0.000538192	0.00843992
jg24071.t1	breast carcinoma-amplified sequence 3 homolog isoform X1	0.000675892	7.71867e-06
jg24074.t1	breast carcinoma-amplified sequence 3 homolog isoform X1	0.00173745	0.000194503
jg24296.t1	titin homolog	6.65789e-05	6.47591e-08
jg24298.t1	titin homolog	0.00103032	1.51044e-06
jg24355.t1	4-coumarate--CoA ligase-like	0.000457866	0.00756699
jg24437.t1	zinc finger FYVE domain-containing protein 1-like isoform X3	0.000218701	0.000474711
jg24473.t1	myosin heavy chain kinase D-like	0.000468374	8.69044e-06
jg2458.t1	insulin receptor substrate 1 isoform X2	0.00103541	0.00344507
jg2460.t1	insulin receptor substrate 1 isoform X6	0.00026202	0.00503742
jg246.t1	zinc finger protein 93-like	0.00036764	0.00712941
jg24712.t1	cytoplasmic dynein 1 intermediate chain isoform X3	0.00119221	0.00192637
jg24735.t1	vacuolar protein sorting-associated protein 33B	0.00127733	0.000599889
jg24801.t1	nuclear receptor-binding factor 2-like	6.17141e-07	3.14528e-06
jg25370.t1	probable beta-hexosaminidase fdl	6.69682e-06	0.00206546
jg25425.t1	dnaJ homolog subfamily C member 2	8.4084e-05	0.00167006
jg25492.t1	TM2 domain-containing protein CG10795	0.00421515	0.00134547
jg25512.t1	G-protein coupled receptor Mth2-like	0.00056577	0.000363269
jg25812.t1	GATA zinc finger domain-containing protein 1	0.00357902	0.00020232
jg25822.t1	abscission/NoCut checkpoint regulator	0.00355842	0.000423094
jg25932.t1	hypothetical protein GWI33_016198	0.000316874	0.000775408
jg25941.t1	death-associated inhibitor of apoptosis 1-like isoform X2	5.06827e-05	0.000166125
jg2598.t1	arylsulfatase B-like	1.86889e-06	1.38276e-05
jg26063.t1	beta-sarcoglycan	3.24789e-05	0.000693792
jg26263.t1	muscle-specific protein 20-like	0.00397099	0.00052787
jg26273.t1	protein crooked neck	0.00184506	0.00430394
jg26441.t1	ubiquitin carboxyl-terminal hydrolase calypso	0.0059227	0.000588374
jg26605.t1	oocyte zinc finger protein XlCOF6-like isoform X9	4.85016e-05	0.000620205
jg26609.t1	krueppel c2h2-type zinc finger protein, putative	0.00468839	0.00254339
jg26617.t1	zinc finger protein OZF-like	0.00302305	0.00303084
jg26619.t1	zinc finger protein 62 homolog	9.76369e-05	0.00389809
jg26628.t1	zinc finger protein 91-like	0.00175877	8.77236e-05
jg26641.t1	zinc finger protein OZF-like	0.00589448	0.0026564
jg26670.t1	F-box only protein 25	1.11924e-05	6.66613e-06
jg26681.t1	activating transcription factor 7-interacting protein 1-like	5.62469e-06	4.19077e-05
jg26702.t1	hypothetical protein FQR65_LT13231	1.1301e-05	1.02737e-05
jg26705.t1	---NA---	0.00112552	0.00587156
jg26711.t1	GTP cyclohydrolase 1-like	0.000733372	0.000370616
jg26743.t1	bifunctional 3'-phosphoadenosine 5'-phosphosulfate synthase	0.000140657	0.00648873
jg26861.t1	deformed epidermal autoregulatory factor 1	0.000563903	0.000298855
jg26903.t1	dendritic arbor reduction protein 1 isoform X1	0.00599419	0.00117006
jg26938.t1	JNK-interacting protein 3 isoform X1	0.00290777	0.00394585
jg26993.t1	hypothetical protein	1.90704e-08	6.00466e-08
jg26997.t1	zinc transporter ZIP11 isoform X1	0.000552595	0.00470104
jg27010.t1	low-density lipoprotein receptor-related protein 1	0.000385359	0.00290527
jg27012.t1	low-density lipoprotein receptor-related protein 1	5.51544e-05	0.00354706
jg27013.t1	low-density lipoprotein receptor-related protein 1	0.000171912	0.00982149
jg272.t1	ribosome production factor 2 homolog	0.00643691	0.0014022
jg27354.t1	monocarboxylate transporter 12	0.000184362	0.00932207
jg27441.t1	eukaryotic translation initiation factor 4E-binding protein Mextli isoform X1	4.66853e-06	9.33975e-05
jg27480.t1	glutamate receptor ionotropic, kainate 2-like	0.000181027	0.00303139
jg27542.t1	flocculation protein FLO11-like	0.000601303	0.000365008
jg27543.t1	PREDICTED: uncharacterized protein LOC109542535 isoform X3	0.00376601	0.000188895
jg27563.t1	period circadian protein	0.000533022	2.7522e-05
jg27564.t1	period circadian protein-like isoform X1	0.00248682	0.000428833
jg27583.t1	---NA---	0.00400355	0.00438174
jg27594.t1	ras-related protein Rab-18-B-like	0.000601109	0.000166803
jg2766.t1	uncharacterized protein LOC123675107	2.49028e-06	5.18788e-06
jg27814.t1	transforming growth factor-beta-induced protein ig-h3	0.000117578	0.000149192
jg27816.t1	transforming growth factor-beta-induced protein ig-h3	0.000654844	6.15294e-05
jg27820.t1	nose resistant to fluoxetine protein 6-like	0.00051555	0.000375669
jg27829.t1	histone-lysine N-methyltransferase SETD2 isoform X1	0.000744138	7.13978e-05
jg27910.t1	hypothetical protein D910_09157	0.00117291	0.00073711
jg27911.t1	pre-mRNA-splicing factor CWC22 homolog	3.64199e-05	0.000751915
jg27920.t1	dnaJ homolog subfamily A member 2-like	2.77903e-07	6.72742e-06
jg27995.t1	aquaporin AQPAe.a-like	5.2898e-05	0.00341458
jg28024.t1	uncharacterized protein LOC115877500	2.84867e-06	2.98718e-06
jg28092.t1	importin-5	0.000170875	0.0039215
jg28313.t1	proton-coupled folate transporter-like	0.000209835	0.00317151
jg28425.t1	venom carboxylesterase-6-like	0.00296281	0.00575095
jg2863.t1	homeobox protein 2 isoform X4	0.00110402	0.000508868
jg29252.t1	forkhead box protein P1-like isoform X1	0.00101343	1.38122e-05
jg29325.t1	GSK-3 bind domain containing protein	0.000229479	0.00347298
jg29351.t1	Uroporphyrinogen decarboxylase-like Protein	0.00569804	0.00016652
jg29450.t1	prolyl 3-hydroxylase 1-like	0.000946395	0.000166977
jg29499.t1	endophilin-A isoform X1	0.000805447	0.000223894
jg29507.t1	calcium/calmodulin-dependent protein kinase type 1 isoform X2	1.75195e-05	0.00237681
jg29510.t1	transcriptional coactivator YAP1-A-like isoform X1	0.000668872	0.000687115
jg29511.t1	transcriptional coactivator YAP1-A isoform X1	0.000353762	0.00033648
jg29527.t1	very low-density lipoprotein receptor-like isoform X1	9.77676e-07	0.00174337
jg29652.t1	MAP kinase-interacting serine/threonine-protein kinase 1	0.00427624	0.000247147
jg29778.t1	BCL2/adenovirus E1B 19 kDa protein-interacting protein 3	0.00266951	0.000131859
jg29830.t1	dual specificity protein phosphatase CDC14B isoform X1	0.000202087	1.73226e-05
jg29880.t1	phosphatase and actin regulator 3 isoform X3	4.62133e-05	4.04977e-05
jg29881.t1	phosphatase and actin regulator 3 isoform X5	0.000762472	0.00052115
jg29882.t1	protein-L-isoaspartate O-methyltransferase domain-containing protein 1-like isoform X1	0.000925541	0.000229401
jg29885.t1	serine/threonine-protein kinase STK11 isoform X2	0.00426771	0.00292517
jg29900.t1	prosaposin isoform X2	7.39853e-06	3.42038e-05
jg2991.t1	protein tumorous imaginal discs, mitochondrial-like isoform X1	0.00021105	0.000675951
jg30080.t1	SCY1-like protein 2	0.000554793	1.91341e-07
jg30085.t1	thymosin beta isoform X3	0.00215743	7.25147e-05
jg30175.t1	cyclin G	4.48028e-05	0.000471576
jg30199.t1	cyclic AMP-responsive element-binding protein 3-like protein 1	8.39393e-05	0.00026608
jg30426.t1	slit homolog 1 protein-like	0.00196802	0.000754033
jg30735.t1	zinc transporter 9	0.00425719	0.00842451
jg30765.t1	proton-coupled amino acid transporter-like protein pathetic isoform X2	0.00154303	0.00157161
jg30769.t1	proton-coupled amino acid transporter-like protein pathetic isoform X2	0.0024722	0.00161599
jg30891.t1	protein TIS11	0.00600442	0.00522491
jg30908.t1	O-acyltransferase like protein-like	0.00327653	0.000366048
jg31144.t1	coiled-coil domain-containing protein 22 homolog	0.0019338	0.000558158
jg31631.t1	membralin isoform X1	5.91879e-05	0.00143546
jg3290.t1	serine-threonine kinase receptor-associated protein	0.00126015	0.0011823
jg3482.t1	G patch domain-containing protein 4	1.92702e-06	1.79461e-05
jg3522.t1	RNA-binding protein with serine-rich domain 1-B-like	0.00289106	0.0014081
jg3536.t1	polycomb group protein Pc	0.00329181	0.000335661
jg3574.t1	ring canal kelch homolog	2.18341e-05	3.57015e-05
jg3575.t1	ring canal kelch protein isoform X1	0.00336737	0.000525176
jg3600.t1	PREDICTED: uncharacterized protein LOC109545320	0.00368405	0.00281423
jg3616.t1	sodium-independent sulfate anion transporter-like	3.52846e-05	0.000135075
jg4134.t1	DNA-directed RNA polymerases I, II, and III subunit RPABC3 isoform X1	2.5975e-06	6.39523e-06
jg4378.t1	putative homeodomain transcription factor isoform X1	0.00144013	0.000162254
jg4478.t1	PREDICTED: uncharacterized protein LOC109535676	0.0054709	0.000888683
jg4486.t1	eukaryotic translation initiation factor 4B	0.00105098	0.00362017
jg4721.t1	elongation of very long chain fatty acids protein 4-like	0.00468381	0.00258176
jg4783.t1	Bedraggled-like protein	0.00209345	0.0040094
jg5177.t1	RNA polymerase II-associated factor 1 homolog	0.000608438	6.02588e-05
jg5458.t1	hemicentin-1 isoform X1	3.08345e-05	3.83195e-07
jg545.t1	optineurin-like isoform X1	3.12135e-05	8.24993e-07
jg5616.t1	organic cation transporter protein	0.00398864	0.000214885
jg5623.t1	viral IAP-associated factor homolog	0.00221819	0.00205963
jg5644.t1	spatacsin isoform X1	0.00255737	0.00235589
jg5685.t1	retinoblastoma-like protein 1 isoform X1	1.62075e-05	5.66673e-05
jg571.t1	RNA polymerase II elongation factor Ell	0.00171744	0.000102874
jg5743.t1	uncharacterized protein LOC115885885	6.53298e-05	0.000885974
jg5767.t1	rhythmically expressed gene 2 protein	3.952e-05	0.000513534
jg5850.t1	cordon-bleu protein-like 1 isoform X2	0.00429282	0.000130691
jg5974.t1	MAPK regulated corepressor interacting protein 2-like	0.000568029	0.00484124
jg5975.t1	protein SDA1 homolog	1.187e-07	0.00243941
jg6019.t1	ras-related protein Rab-1A	0.000124971	0.000272708
jg6023.t1	homocysteine S-methyltransferase 1-like	0.00435663	0.00119478
jg6053.t1	facilitated trehalose transporter Tret1-like	0.000139297	5.17367e-05
jg6106.t1	hillarin-like isoform X1	0.00557823	0.00368513
jg6114.t1	proteoglycan 4-like	0.00103962	0.0014904
jg619.t1	proton-associated sugar transporter A	0.000877306	0.000628715
jg6214.t1	protein krasavietz	2.02575e-05	0.00159734
jg621.t1	probable ATP-dependent RNA helicase pitchoune	0.000136828	0.00742052
jg6297.t1	charged multivesicular body protein 4c	0.00317915	0.00084663
jg6624.t1	vascular endothelial growth factor receptor 1 isoform X1	0.00200427	0.00207356
jg6680.t1	serine/threonine-protein kinase TBK1	0.00168498	0.00019428
jg681.t1	---NA---	0.00591616	0.000130612
jg699.t1	zinc finger protein 391-like isoform X2	0.004703	0.00514689
jg7340.t1	josephin-like protein	0.00221114	0.0029222
jg7372.t1	shootin-1	0.00159322	2.08071e-05
jg7375.t1	shootin-1	0.000583193	0.000172723
jg756.t1	CTP synthase	1.16339e-09	0.00012532
jg759.t1	CTP synthase	1.24865e-08	0.000420873
jg764.t1	protein preli-like	0.000138024	0.00129274
jg7688.t1	PREDICTED: uncharacterized protein LOC109539646	0.00054211	0.00396771
jg7730.t1	KH domain-containing protein akap-1	1.38124e-05	0.000582497
jg7845.t1	pancreatic triacylglycerol lipase-like	2.10953e-05	0.000756572
jg7850.t1	4-hydroxyphenylpyruvate dioxygenase	1.7278e-08	0.00144941
jg7893.t1	macrophage erythroblast attacher	2.07881e-05	5.56766e-05
jg8009.t1	serine/threonine-protein kinase PITSLRE	0.0049009	0.000283618
jg8091.t1	A-kinase anchor protein 10, mitochondrial	0.000273204	0.000518453
jg8236.t1	clc-like protein 2	0.00411824	0.000300356
jg8243.t1	Werner syndrome ATP-dependent helicase-like	1.94076e-06	0.000715589
jg8444.t1	hypothetical protein YQE_03157, partial	0.00247783	0.000367053
jg8565.t1	vacuolar protein sorting-associated protein 33A	0.00493794	0.000377136
jg9157.t1	zinc finger X-chromosomal protein-like isoform X1	5.08554e-05	0.00173805
jg9193.t1	hypothetical protein D910_05204	0.00025613	0.000116588
jg9194.t1	egalitarian protein homolog	0.00154461	0.00157479
jg926.t1	---NA---	2.13338e-05	0.00157065
jg928.t1	ADP-ribosylation factor-like protein 6-interacting protein 4	0.000101684	0.000933042
jg9538.t1	GDNF-inducible zinc finger protein 1	2.61585e-07	6.65489e-07
jg9539.t1	zinc finger and SCAN domain-containing protein 21-like isoform X1	1.93563e-05	2.83876e-05
jg9763.t1	chemosensory protein 4	0.000694807	0.00706031
jg9932.t1	probable phospholipid hydroperoxide glutathione peroxidase	0.00587515	0.00818955
jg9933.t1	probable phospholipid hydroperoxide glutathione peroxidase isoform X3	3.30386e-05	0.00569419

## Sheet: downregulated
Gene	Annotation	LowDose (pval)	HighDose (pval)
jg13461.t1	esterase B1-like	0.000562312	0.0044437
jg13462.t1	esterase B1-like	3.74488e-05	0.00308926
jg13463.t1	esterase B1-like	1.01037e-06	0.000264029
jg20481.t1	probable cytochrome P450 28a5	2.58831e-06	3.23049e-05
jg20486.t1	probable cytochrome P450 28a5	0.0007176	9.43465e-05
jg27392.t1	multidrug resistance-associated protein 4-like	2.14072e-05	1.29132e-05
jg748.t1	probable multidrug resistance-associated protein lethal(2)03659	6.43534e-06	1.18067e-05
jg29902.t1	multidrug resistance-associated protein 1-like	1.08525e-05	0.00104438
jg21506.t1	multidrug resistance-associated protein 4-like	1.38912e-05	0.000874748
jg5786.t1	multidrug resistance-associated protein 4-like	0.000702869	0.000123691
jg3842.t1	cytochrome P450 4C1-like	0.00287841	0.00989091
jg5451.t1	glutathione S-transferase-like	0.000311024	0.00448271
jg5452.t1	glutathione S-transferase-like	2.61304e-06	0.00190937
19968_g	NA	0.00249681	0.000762328
jg10085.t1	protein transport protein Sec23A isoform X2	1.48826e-05	2.61625e-05
jg10096.t1	neutral alpha-glucosidase C-like	4.10892e-07	0.000238257
jg1041.t1	hypothetical protein HUJ05_011859	0.00168385	0.00959075
jg10427.t1	PREDICTED: uncharacterized protein LOC109543003 isoform X1	0.00125949	0.0095463
jg1042.t1	early growth response protein 1-B isoform X1	0.000179406	0.00185592
jg10966.t1	Rho guanine nucleotide exchange factor 7-like Protein	2.7692e-05	0.00815782
jg10986.t1	dolichyl-diphosphooligosaccharide--protein glycosyltransferase subunit STT3B	2.26134e-05	0.00195513
jg10989.t1	dolichyl-diphosphooligosaccharide--protein glycosyltransferase subunit STT3B	6.91588e-07	0.00137917
jg11062.t1	UDP-glucose 4-epimerase isoform X2	0.000229516	0.00276865
jg11142.t1	dopamine N-acetyltransferase-like isoform X2	0.0058892	0.00633354
jg11237.t1	tumor suppressor candidate 3	8.63832e-08	0.000357058
jg11240.t1	sphingomyelin phosphodiesterase-like	0.000303782	0.0016999
jg11459.t1	ADP-ribosylation factor-like protein 1	0.00561055	0.00237735
jg11624.t1	glycine N-methyltransferase	4.28472e-06	0.00363431
jg11764.t1	PREDICTED: uncharacterized protein LOC109546095	0.000643263	0.00397975
jg11771.t1	bestrophin-2-like isoform X3	0.00105628	0.000399793
jg12124.t1	zinc finger protein 184-like isoform X6	0.000740694	0.00317665
jg12126.t1	zinc finger and BTB domain-containing protein 24-like isoform X3	0.00252463	0.00135547
jg12129.t1	hypothetical protein HUJ04_000614	3.65554e-05	0.00773448
jg12244.t1	spermine oxidase-like isoform X1	8.01471e-05	0.00481885
jg12701.t1	titin isoform X1	0.000811128	0.000109958
jg13027.t1	signal recognition particle 54 kDa protein	0.00173212	0.000908387
jg13029.t1	signal recognition particle 54 kDa protein	0.00128254	2.05015e-05
jg13445.t1	ATP-dependent translocase ABCB1	0.000784538	0.00249737
jg13501.t1	FK506-binding protein 2	0.00159447	0.00815942
jg13665.t1	GDP-mannose 4,6 dehydratase	3.68131e-07	0.000158513
jg13945.t1	PREDICTED: uncharacterized protein LOC109534792 isoform X2	0.00102836	0.000761263
jg1396.t1	coatomer subunit beta	0.00171903	0.000250885
jg13975.t1	glutamine--fructose-6-phosphate aminotransferase [isomerizing] 2-like isoform X4	5.07005e-05	0.000733134
jg14224.t1	dihydropyrimidine dehydrogenase [NADP(+)]	3.18051e-05	8.75764e-05
jg14268.t1	ER lumen protein-retaining receptor	2.88574e-05	0.000383668
jg14360.t1	coatomer subunit delta	0.00477691	0.00215282
jg14467.t1	piggyBac transposable element-derived protein 3-like	0.00106052	0.000142145
jg14490.t1	ankyrin repeat domain-containing protein 6	0.000886471	0.00422544
jg14585.t1	neutral alpha-glucosidase AB	2.55525e-05	0.0016109
jg14808.t1	facilitated trehalose transporter Tret1-like	0.000867841	0.00329645
jg14829.t1	serum response factor homolog	0.00534197	0.00600264
jg14966.t1	cytochrome B5	0.000363932	0.00897741
jg15139.t1	phosphoglycolate phosphatase 2-like	1.39723e-05	0.00565022
jg15306.t1	caspase-1-like protein	0.00513085	0.00829498
jg1533.t1	putative nuclease HARBI1	0.000367202	0.00549686
jg15384.t1	protein alan shepard isoform X4	0.00283438	0.00283866
jg15622.t1	Putative 115 kDa protein in type-1 retrotransposable element R1DM-like Protein	0.00157569	0.00410352
jg15747.t1	acyl-protein thioesterase 1	0.00529507	0.0013678
jg15767.t1	minor histocompatibility antigen H13	8.7395e-06	0.0049354
jg15887.t1	aminopeptidase N-like	6.29857e-08	0.00146091
jg15889.t1	aminopeptidase N-like	7.50487e-07	0.00345251
jg158.t1	---NA---	3.43182e-05	7.61031e-08
jg15975.t1	translocating chain-associated membrane protein 1	1.00506e-07	1.08161e-06
jg16070.t1	glycoside hydrolase family 45 protein	0.00122861	0.00448199
jg16168.t1	glycoprotein-N-acetylgalactosamine 3-beta-galactosyltransferase 1	0.000534327	0.000234664
jg16310.t1	fatty acid synthase	0.000309605	0.00118684
jg16590.t1	transmembrane 9 superfamily member 3	0.00133266	0.00211713
jg17028.t1	cytochrome c oxidase assembly protein COX11, mitochondrial	0.00594427	0.00905037
jg17268.t1	facilitated trehalose transporter Tret1	0.0007273	0.00779243
jg18053.t1	Fibroblast growth factor receptor-like 1	0.000129334	0.00350014
jg18054.t1	GDP-fucose transporter 1	0.00186173	0.00264736
jg18080.t1	tRNA-splicing ligase RtcB homolog	0.0034867	0.000480058
jg18085.t1	malectin	0.000601118	0.000317951
jg18214.t1	2-hydroxyacylsphingosine 1-beta-galactosyltransferase-like	0.00180683	0.00858787
jg1855.t1	unnamed protein product	0.0015447	0.00236118
jg18774.t1	cuticle protein-like	8.71047e-05	0.00919785
jg19121.t1	glutamate--cysteine ligase	0.000281617	0.000129554
jg1918.t1	Retrovirus-related Pol polyprotein from transposon TNT 1-94	0.0025314	0.0090045
jg19253.t1	hypothetical protein GWI33_015368	0.0016188	0.00839065
jg19298.t1	mitochondrial glutamate carrier 1-like	0.000296048	0.00859507
jg19362.t1	dolichyl-diphosphooligosaccharide--protein glycosyltransferase subunit 2	2.61063e-06	1.46372e-05
jg19524.t1	endoplasmic reticulum resident protein 29	7.14829e-05	0.000502796
jg19695.t1	probable pseudouridine-5'-phosphatase isoform X2	4.38752e-06	0.000625259
jg19920.t1	solute carrier family 35 member B1 homolog	5.46929e-07	1.60786e-05
jg19956.t1	translocon-associated protein subunit beta	0.00191782	0.000141232
jg20282.t1	nuclear protein localization protein 4 homolog	0.00369856	0.000774702
jg21229.t1	cathepsin L-like proteinase	0.00629067	0.00282416
jg21364.t1	cytosolic 10-formyltetrahydrofolate dehydrogenase	0.000493392	0.000155534
jg21451.t1	glucose dehydrogenase [FAD, quinone]	0.000754261	0.000487629
jg21487.t1	regucalcin-like	0.000196788	0.000144594
jg21575.t1	transmembrane emp24 domain-containing protein 2	0.000202367	0.00862147
jg21605.t1	sodium/nucleoside cotransporter 1-like	2.68387e-06	0.000109529
jg21909.t1	flexible cuticle protein 12-like	0.000503735	0.000535744
jg21981.t1	endocuticle structural glycoprotein SgAbd-2-like	0.000296119	0.00256329
jg22082.t1	mannose-1-phosphate guanyltransferase beta	2.32333e-06	5.49153e-05
jg22474.t1	myrosinase 1-like	0.000437514	0.000696046
jg22479.t1	myrosinase 1-like	0.000144771	0.00081578
jg22709.t1	heat shock protein 75 kDa, mitochondrial	0.00038765	0.00988176
jg22720.t1	DNA damage-regulated autophagy modulator protein 2-like	0.00033512	0.00750412
jg23399.t1	unnamed protein product	0.000666786	0.000855339
jg23447.t1	estrogen sulfotransferase-like	0.000123333	0.00372035
jg24045.t1	transient receptor potential channel pyrexia	0.00313999	0.0022862
jg24051.t1	dnaJ homolog subfamily C member 3	0.000902624	0.000682118
jg24583.t1	beta-glucuronidase-like isoform X1	0.00147598	0.00633446
jg24660.t1	uncharacterized protein LOC123673279	1.00073e-05	3.95874e-05
jg24843.t1	mitochondrial ornithine transporter 1	0.000860404	0.000501065
jg25156.t1	titin homolog isoform X2	0.00140856	0.00540686
jg25433.t1	nicalin	0.00112172	0.00529927
jg25684.t1	odorant binding protein	0.00319188	0.00242967
jg25686.t1	odorant binding protein	1.58103e-07	0.00744833
jg25688.t1	odorant binding protein	0.00384741	0.00151229
jg25689.t1	odorant-binding protein	1.066e-06	5.95618e-05
jg25695.t1	odorant binding protein	0.000352226	0.0043998
jg25750.t1	myrosinase 1-like	0.000302179	0.00743132
jg25751.t1	myrosinase 1-like	6.7259e-05	0.00949016
jg25787.t1	protein seele	0.00295669	5.16393e-05
jg25935.t1	protein transport protein Sec16B isoform X1	0.000114991	0.00149187
jg26032.t1	signal peptidase complex catalytic subunit SEC11A	8.68988e-05	0.00249494
jg26043.t1	neutral alpha-glucosidase C-like	0.00013207	0.00633261
jg26151.t1	mesencephalic astrocyte-derived neurotrophic factor homolog	0.00387699	0.000140974
jg26512.t1	translocon-associated protein subunit alpha	0.0051992	0.0003888
jg26603.t1	transmembrane emp24 domain-containing protein 7	0.000124828	0.00467872
jg26709.t1	probable glutamine--tRNA ligase	0.000791533	0.000545991
jg26961.t1	protein disulfide-isomerase A6 homolog	3.84856e-08	1.20706e-05
jg27046.t1	Proteasome subunit alpha	4.08856e-05	0.000185248
jg27474.t1	zinc finger MYM-type protein 1-like	0.00141637	0.00409153
jg27572.t1	probable signal peptidase complex subunit 2	0.00347512	0.00377685
jg27595.t1	RNA-binding protein 48	0.00470209	0.0072452
jg27607.t1	mannose-1-phosphate guanyltransferase alpha-A	0.00276389	0.00296938
jg27626.t1	mannose-P-dolichol utilization defect 1 protein homolog	0.000429737	0.00176018
jg27725.t1	26S proteasome non-ATPase regulatory subunit 1	8.08772e-05	0.00318927
jg27748.t1	protein archease-like	0.00241109	0.00963588
jg27776.t1	venom serine carboxypeptidase-like	7.81763e-06	0.000894545
jg27834.t1	dnaJ homolog shv	1.2209e-05	9.84633e-06
jg27915.t1	valine--tRNA ligase	0.00184309	0.00887013
jg27917.t1	FAD-dependent oxidoreductase domain-containing protein 1	0.00596752	0.000710702
jg27928.t1	proteasome subunit beta type-7	0.00154216	0.00027525
jg28081.t1	probable 26S proteasome non-ATPase regulatory subunit 3	0.000896969	0.00741827
jg28135.t1	translocation protein SEC63 homolog	0.00392823	0.0016207
jg2926.t1	ero1-like protein	0.000535606	0.00101505
jg29312.t1	protein disulfide-isomerase A3	0.000483222	0.00711397
jg29363.t1	NAD-dependent protein deacetylase Sir2B-like	0.00517349	0.00686515
jg29490.t1	translocon-associated protein subunit delta	0.000121063	0.000656051
jg29545.t1	probable salivary secreted peptide	0.00114958	0.00562366
jg29709.t1	C-type lectin	0.000662718	0.00392476
jg29963.t1	monocarboxylate transporter 7-like	1.49403e-06	0.00252667
jg303.t1	serine protease inhibitor dipetalogastin	4.02534e-05	0.00621926
jg3041.t1	proteasome subunit alpha type-3	0.000262693	0.00171137
jg3053.t1	monocarboxylate transporter 7-like	0.000207748	0.000811636
jg3055.t1	alpha-N-acetylgalactosaminidase	0.000261358	0.00938341
jg30881.t1	ectonucleoside triphosphate diphosphohydrolase 5 isoform X1	0.000949566	0.000495093
jg30901.t1	vesicle-trafficking protein SEC22b-B	0.00257326	0.000198704
jg31643.t1	ATP-binding cassette sub-family B member 10, mitochondrial isoform X2	2.63957e-05	0.000191775
jg3168.t1	venom serine carboxypeptidase-like	2.55691e-06	0.000414127
jg3176.t1	UDP-glucuronosyltransferase 2C1-like	0.000214828	0.00581279
jg3220.t1	polypeptide N-acetylgalactosaminyltransferase 3-like	0.00244591	0.00209984
jg3428.t1	protein bark beetle isoform X2	0.00362102	0.00698859
jg3481.t1	6-phosphogluconolactonase	0.00449018	0.00693555
jg3509.t1	L-xylulose reductase-like	1.69235e-05	0.00021726
jg3650.t1	mitochondrial dicarboxylate carrier	2.53463e-05	0.00178029
jg3726.t1	facilitated trehalose transporter Tret1-like isoform X1	0.00291084	0.00109175
jg3788.t1	Beta-mannosidase-like Protein	0.0040003	0.00934189
jg4358.t1	ER membrane protein complex subunit 10	0.00572446	0.000360631
jg437.t1	heat shock 70 kDa protein cognate 3	6.22451e-06	1.19019e-05
jg440.t1	heat shock 70 kDa protein cognate 3	3.65716e-05	5.58244e-05
jg462.t1	hypothetical protein ILUMI_14653	0.001956	0.00512044
jg4779.t1	argininosuccinate synthase	0.000203299	0.000982434
jg4794.t1	UDP-N-acetylglucosamine transporter isoform X1	0.000195903	0.00323481
jg4800.t1	PREDICTED: uncharacterized protein LOC109533640	8.23801e-05	0.00774011
jg4948.t1	aminopeptidase N-like	1.30081e-05	0.00529584
jg5035.t1	glucosidase 2 subunit beta	0.00159789	0.00357028
jg5149.t1	rhamnogalacturonate lyase-like	0.00216402	0.00345585
jg5150.t1	rhamnogalacturonate lyase-like	3.61771e-07	0.00318237
jg5157.t1	dolichyl-diphosphooligosaccharide--protein glycosyltransferase subunit DAD1	6.65089e-05	0.00574873
jg528.t1	leucine-rich melanocyte differentiation-associated protein-like isoform X2	0.00337345	0.00143019
jg531.t1	beta-galactosidase-1-like protein 2	8.69402e-06	0.000773558
jg5379.t1	protein ERGIC-53	8.12092e-05	0.00183565
jg5518.t1	cGMP-dependent protein kinase, isozyme 1-like	3.1839e-07	0.00145021
jg5692.t1	probable aminopeptidase NPEPL1	0.000132531	0.00223767
jg5693.t1	carbonyl reductase [NADPH] 1-like	4.83544e-06	0.00133061
jg5798.t1	dolichyl-diphosphooligosaccharide--protein glycosyltransferase subunit 1	3.79907e-06	5.18579e-05
jg5800.t1	dolichyl-diphosphooligosaccharide--protein glycosyltransferase subunit 1	3.70286e-07	2.56414e-05
jg5997.t1	26S proteasome regulatory subunit 4	0.00278621	0.00276147
jg6026.t1	stromal cell-derived factor 2	0.000180717	7.34194e-06
jg6504.t1	PREDICTED: uncharacterized protein LOC109536237	1.21567e-05	0.00026751
jg6608.t1	guanine nucleotide-binding protein G(f) subunit alpha	0.000364229	0.00071862
jg6610.t1	coatomer subunit zeta-1 isoform X1	0.00479408	0.00492421
jg6674.t1	kielin/chordin-like protein isoform X1	0.00190885	0.000882354
jg668.t1	proteasome subunit alpha type-4	0.000708854	0.00101972
jg7512.t1	cationic amino acid transporter 3-like	0.000545506	0.000247661
jg7896.t1	protein transport protein Sec61 subunit alpha	0.00279616	8.52935e-06
jg7922.t1	endoplasmin	0.000358499	0.000270659
jg8050.t1	FGGY carbohydrate kinase domain-containing protein	0.000885287	0.000198094
jg8075.t1	regucalcin-like isoform X3	0.00380983	0.00174354
jg8118.t1	sterol O-acyltransferase 1-like	0.00478808	0.00493715
jg832.t1	CAAX prenyl protease 1 homolog	0.000239561	3.0959e-05
jg8442.t1	seminal fluid protein	9.47571e-05	0.00151927
jg8772.t1	prostatic acid phosphatase-like isoform X1	1.41637e-05	5.20902e-05
jg8808.t1	protein phosphatase inhibitor 2-like	0.0054592	0.00161953
jg8812.t1	DNA replication licensing factor Mcm6	0.00556472	0.00194849
jg8896.t1	staphylococcal nuclease domain-containing protein 1	0.00116428	0.0042687
jg8897.t1	uncharacterized protein LOC115883254	0.00118495	0.00495906
jg8945.t1	oxygen-dependent coproporphyrinogen-III oxidase	0.00233956	0.00220479
jg8984.t1	acetyl-CoA carboxylase isoform X2	0.000135284	0.00896192
jg9393.t1	fatty acid-binding protein, liver-type-like	0.000851934	0.00963557
jg9712.t1	putative juvenile hormone-inducible protein	4.60536e-06	1.48002e-06
jg9713.t1	EcKinase, DUF1679, and/or APH domain containing protein	3.89141e-06	0.000631028
jg9997.t1	proteasome subunit beta type-6	9.42103e-06	3.22293e-05

## Sheet: up_down_regulated
Gene	Annotation	LowDose (pval)	HighDose (pval)
jg15123.t1	uncharacterized protein LOC115879487	0.000229308	1.20084e-06
jg16545.t1	UDP-glucose 6-dehydrogenase isoform X1	0.00458838	0.000589405
jg25554.t1	5'-3' exoribonuclease 2 homolog	0.00287982	0.000141309
jg25690.t1	odorant binding protein	0.000574826	0.000811639
jg26466.t1	calcium and integrin-binding protein 1-like	1.25861e-07	0.000933319
jg4209.t1	putative transcription factor SOX-15	0.00271052	9.83319e-05
jg6321.t1	pyroglutamyl-peptidase 1	0.00414773	0.00738912
jg9000.t1	uncharacterized protein LOC115881875	0.00550199	0.00225335
